# Supplementary material for: Technical note: Flow cytometry assays for the detection, counting and cell-sorting of polyphosphate-accumulating bacteria
Source: Copernicus journal article supplement (doi:10.5194/egusphere-2024-1085), 2024-05-02
Supplement: Supplementary file 1 [file egusphere-2024-1085-supplement.pdf]

*Supplement of*

**Technical note: Flow cytometry assays for the detection, counting and cell-sorting of polyphosphate-accumulating bacteria**

Clémentin Bouquet<sup>1</sup>, Hermine Billard<sup>1,2</sup>, Cécile C. Bidaud<sup>3</sup>, Jonathan Colombet<sup>1,2</sup>, Young-Tae Chang<sup>4,5</sup>, Karim Benzerara<sup>3</sup>, Fériel Skouri-Panet<sup>3</sup>, Elodie Duprat<sup>3</sup>, Anne-Catherine Lehours<sup>1</sup>

Correspondence to: Anne-Catherine Lehours (a-catherine.lehours@uca.fr)

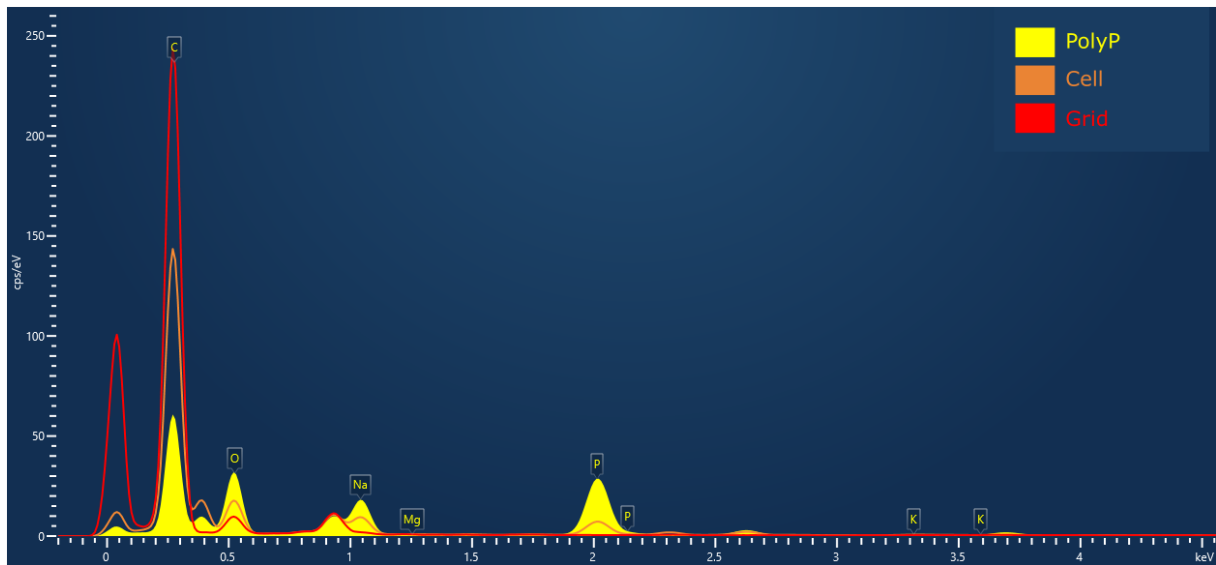

**Figure S.1 : Representative EDX spectra of PolyP granule in *Tetrasphaera elongata* (PolyP) compared to EDX spectra outside polyP granule (cell) and outside the cell (grid).**
